# Supplementary material for: Synthesis and characterization of magnetic copper–iron-titanate and uptake studies of americium from nuclear waste solutions
Source: Royal Society of Chemistry journal article supplement (doi:10.1039/c6ra24266a), 2016-01-01
Supplement: c6ra24266a1.pdf [file c6ra24266a1.pdf]

## **Synthesis and characterization of magnetic Copper-Iron-Titanate and uptake studies of Americium from nuclear waste solutions**

Krishnan Muthukumar<sup>a</sup>, D. Shanthana Lakshmi<sup>b\*</sup>, Rajesh B. Gujar<sup>c</sup>, A. B. Boricha<sup>a</sup>, P. K. Mohapatra<sup>c,d\*\*</sup>,  
H.C.Bajaj<sup>a,\*\*\*</sup>

**Electronic supportive information (ESI)**

## EXPERIMENTAL:

### Sorption studies:

All the metal ion sorption studies were carried out by taking a known amount (ca. 10 mg) of the sorbent (TF or CTF nanomaterials) in a fixed volume of aqueous phase (usually 1 mL of pH 4 solution) and the melange was equilibrated in a thermostated water bath where samples were mounted on to a rotating plate which were subsequently rotated at a speed of 45 rpm.

$^{241}\text{Am}$  was purified from the associated impurities ( $^{237}\text{Np}$ ) by an ion exchange method. Initially, hydroxylamine hydrochloride (5-10 mg) was added to the solution (ca. 2 mL of 7 M  $\text{HNO}_3$ ) containing the radiotracer to adjust the oxidation state of Np to the +4 state. Subsequently, the mixture of  $^{241}\text{Am}$  containing traces of  $^{237}\text{Np}$  was loaded to a DOWEX 1x4 resin, pre-conditioned with 7 M  $\text{HNO}_3$ . The washings were collected and used as  $^{241}\text{Am}$  stock while  $^{237}\text{Np}$  was loaded on to the column. The purity of the tracer was confirmed by alpha-spectrometry.

$^{241}\text{Am}$  and  $^{152,154}\text{Eu}$  were assayed radiometrically using a well type NaI(Tl) scintillation counter which was interphased with a multi-channel analyzer. The counter was calibrated with known standards before the counting was done. Enough counts were collected (>10,000 counts) to neglect the counting statistics errors (<1%).

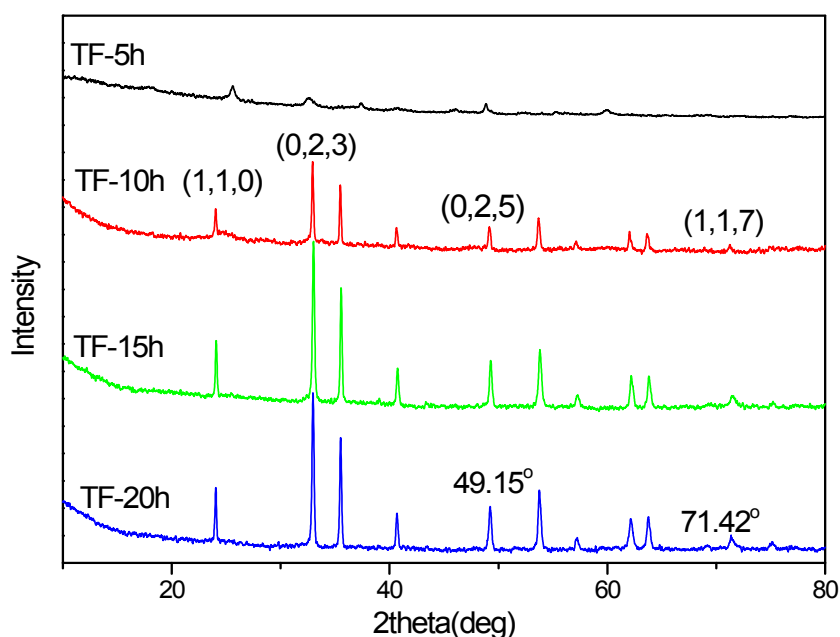

Fig-S1 PXR D of Pseudobrookite ( $\text{Fe}_2\text{TiO}_5$ ) prepared at  $200^\circ\text{C}$  with different time

### FTIR Studies:

The TF and CTF nanomaterials were analyzed by Fourier Transformation – Infrared Spectroscopy (FT-IR) using Perkin Elmer-Spectrum GX spectrometry from 400-4000 $\text{cm}^{-1}$  with a resolution of 4 $\text{cm}^{-1}$  using KBr pellets. As shown below, not much information was obtained for the metal-oxide bands.

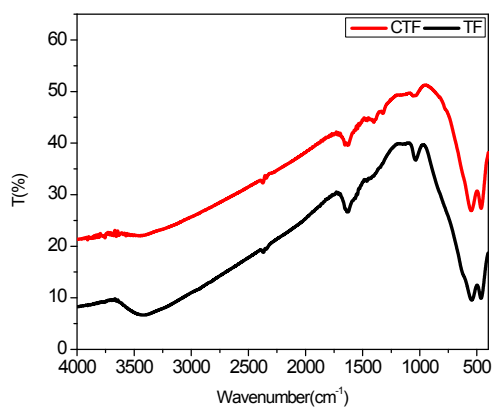

Fig. S2: FT-IR spectra of the CTF and TF nanomaterials

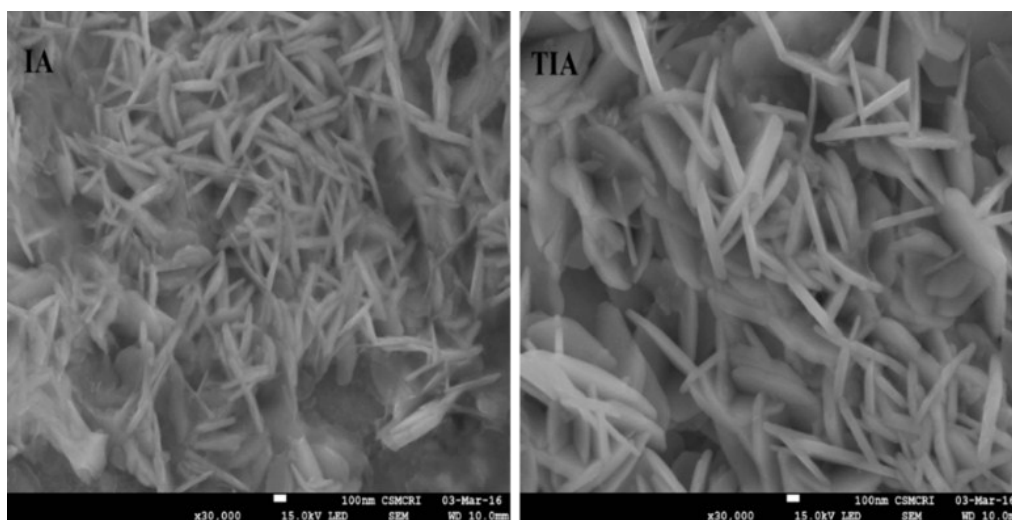

Fig-S3 FE\_SEM images of Iron precursor (IA) in methanol and TIA- iron precursor with Ti(IV) isopropoxide

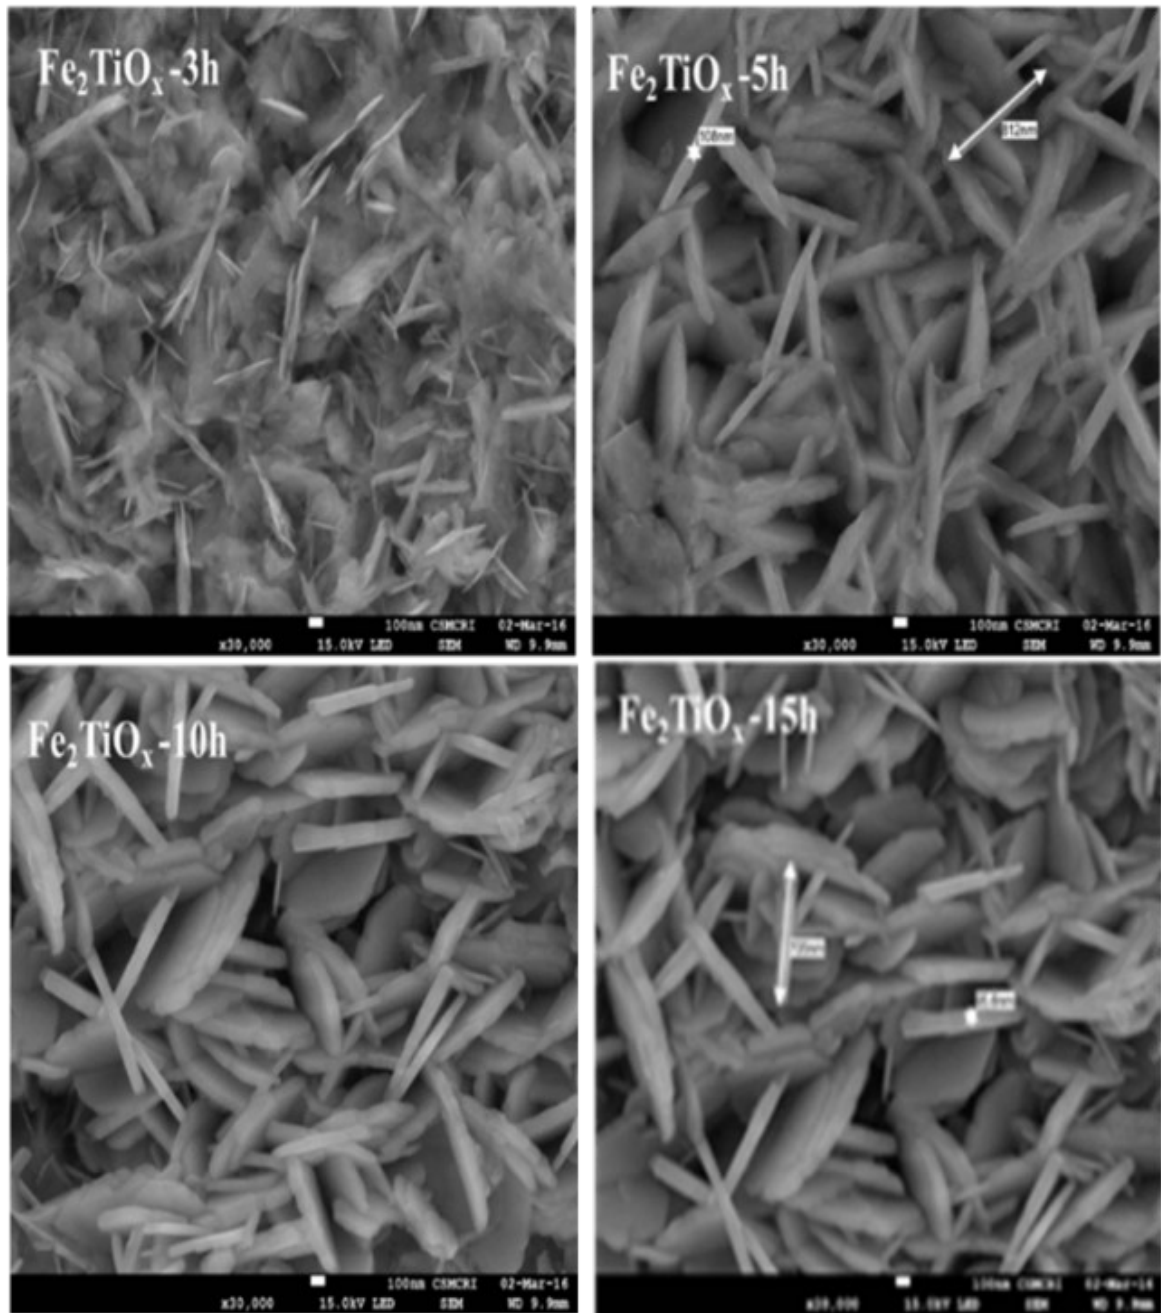

Fig-S4 a, b, c and d FE-SEM of iron titanate prepared at different time interval

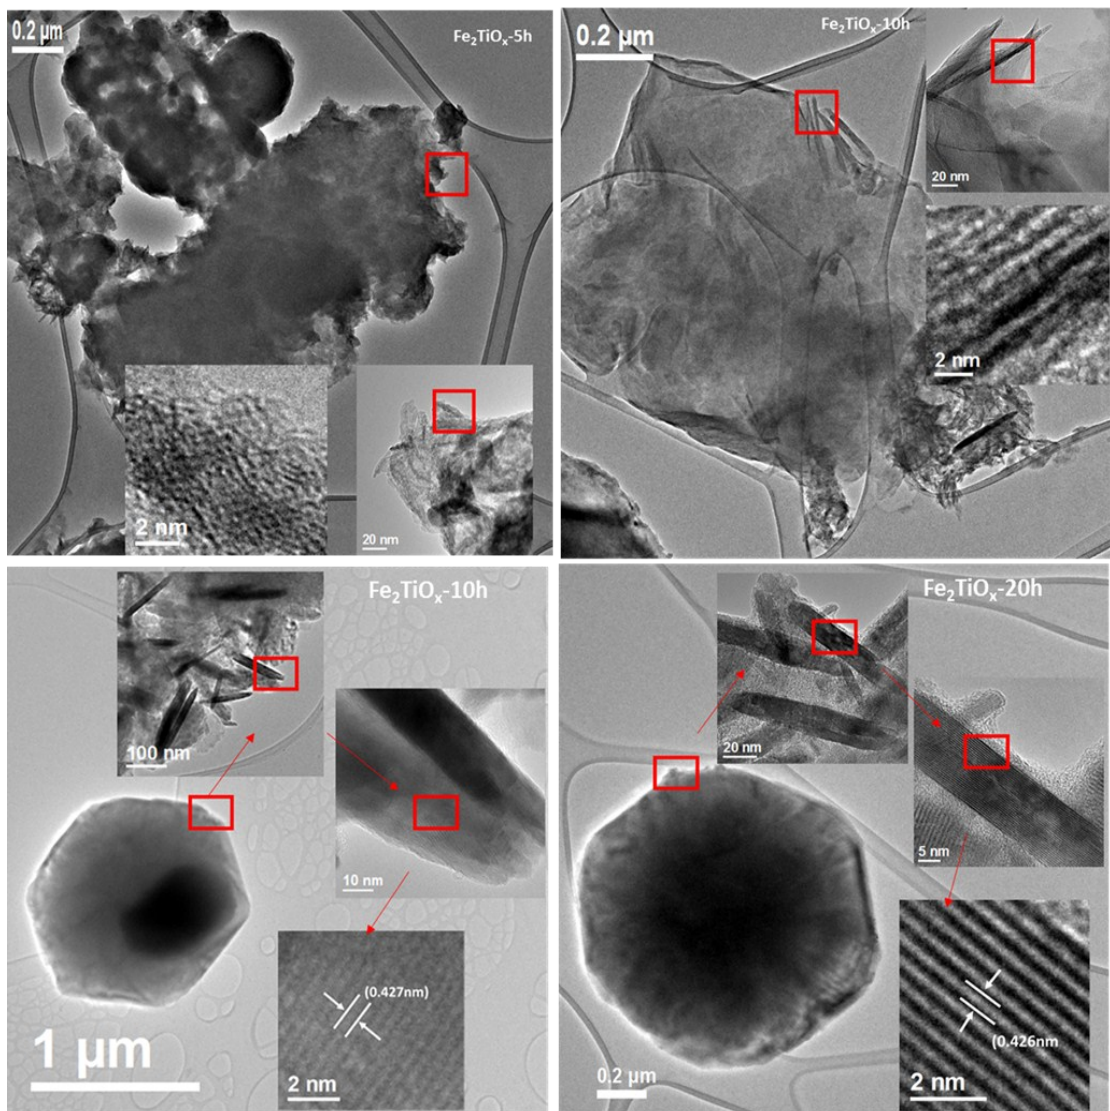

Fig-S5 HR-TEM image of Iron titanate prepared at different time interval

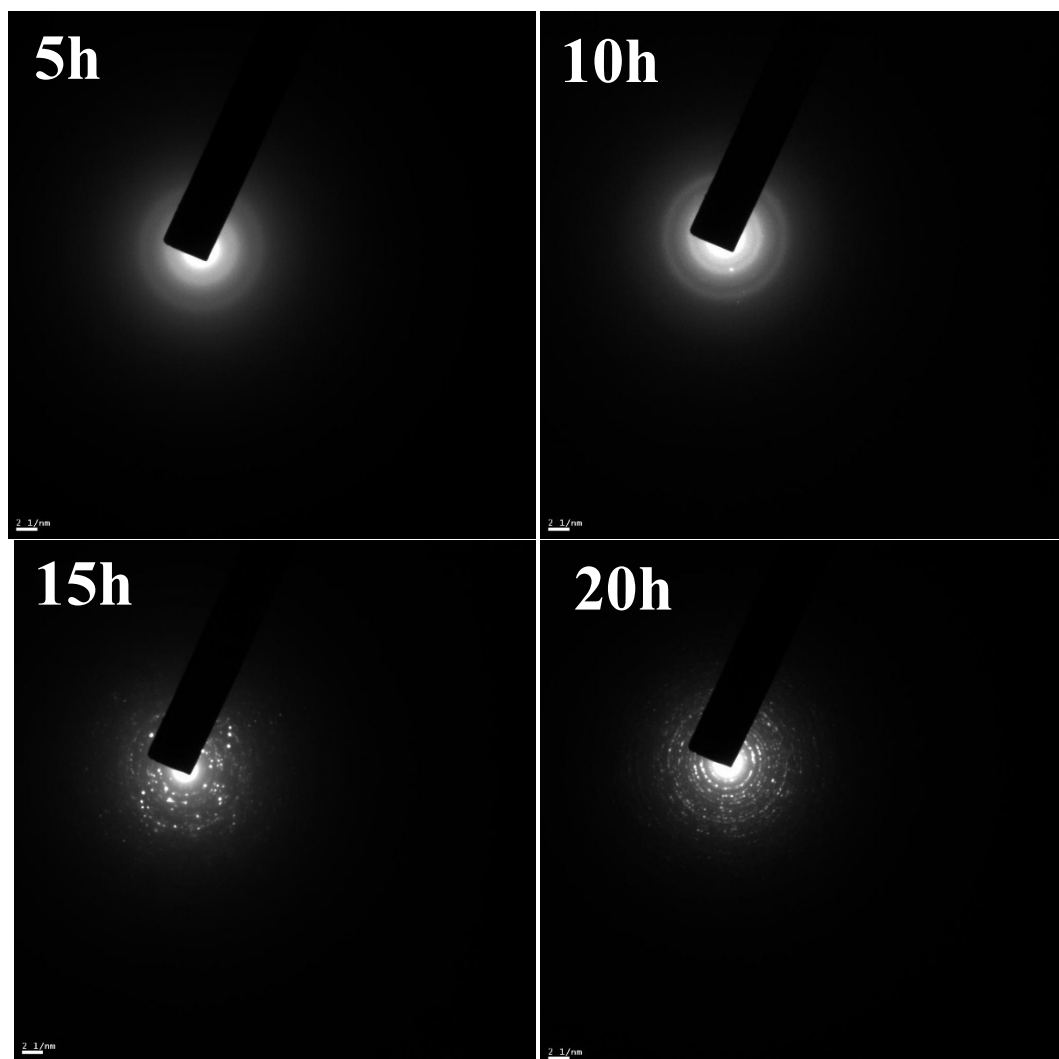

Fig-S6 Selective Area Electron Diffraction (SAED) of iron titanate prepared at different time interval

**Table-S1 Linearized form of various sorption isotherms**

| <b>Isotherm</b> | <b>Linearized form</b>                                                      | <b>Plot</b>                      | <b>Parameters</b>                                          |
|-----------------|-----------------------------------------------------------------------------|----------------------------------|------------------------------------------------------------|
| Langmuir        | $\frac{C_{eq}}{q_t} = \frac{[1]}{b \cdot q_{max}} + \frac{C_{eq}}{q_{max}}$ | $\frac{C_{eq}}{q_t}$ vs $C_{eq}$ | $q_{max} = 1/\text{slope}$<br>$b = \text{Slope/intercept}$ |
| D-R             | $\ln q_t = \ln X_m - \beta \varepsilon^2$                                   | $\ln q_t$ vs $\varepsilon^2$     | $X_m = \text{Intercept}$<br>$E = 1/2\beta^{0.5}$ (slope)   |
| Freundlich      | $\log q_{eq} = \log K_f + \frac{1}{n} \log C_{eq}$                          | $\log q_e$ vs $C_{eq}$           | $K_f = \text{Intercept}$<br>$n = 1/\text{slope}$           |

<sup>a</sup>:  $q_{eq}$  and  $q_t$  are the concentration of Am(III) sorbed per gram of the nanomaterial at equilibrium and at time t, respectively;  $C_{eq}$  is the equilibrium concentration of metal ions in the aqueous phase;  $q_{max}$  and b are the maximum sorbed mass of Eu(III) at saturation and the sorption coefficient, respectively;  $X_m$  is maximum sorption capacity of the nanomaterial.

**Table-S2: Parameters of the Langmuir Model for the sorption of Eu(III) on iron titanate and copper doped iron titanate; Aqueous phase: pH 4; Temperature: 25°C**

| <b>Nanomaterial Type</b> | <b>b (L·mg<sup>-1</sup>)</b> | <b>q<sub>max</sub> (mg·g<sup>-1</sup>)</b> | <b>R<sup>2</sup></b> | <b>Exp. q (mg·g<sup>-1</sup>)</b> |
|--------------------------|------------------------------|--------------------------------------------|----------------------|-----------------------------------|
| Iron titanate            | 0.16 ± 0.03                  | 5.9 ± 0.1                                  | 0.9910               | 6.1 ± 0.2                         |
| Copper - iron titanate   | 0.012 ± 0.002                | 20.4 ± 0.7                                 | 0.9963               | 21.3 ± 0.4                        |

**Table-S3: Parameters of the Freundlich Model for the sorption of Eu(III) on iron titanate and copper doped iron titanate; Aqueous phase: pH 4; Temperature: 25°C**

| <b>Nanomaterial Type</b> | <b>K<sub>f</sub></b> | <b>R<sup>2</sup></b> | <b>1/n</b>  |
|--------------------------|----------------------|----------------------|-------------|
| Iron titanate            | 1.34 ± 0.02          | 0.8997               | 0.31 ± 0.03 |
| Copper-iron titanate     | 2.09 ± 0.03          | 0.9977               | 0.33 ± 0.01 |

**Leaching test:**

The leaching test was carried out by contacting 1000 ppm nano material solution prepared and treated with different concentration nitric acid (0.1 M and 1 M solution). The results are included in the table S4.

**Table S4: Leaching studies carried out by contacting the nanomaterials with 0.1 M and 1 M HNO<sub>3</sub>. The aqueous phases after contacting with the nanomaterials were analyzed by ICP-OES method.**

| [HNO <sub>3</sub> ]<br>(nanomaterial) | % leaching of the components |     |     | Comment                       |
|---------------------------------------|------------------------------|-----|-----|-------------------------------|
|                                       | Cu                           | Fe  | Ti  |                               |
| 0.1 M (CTF)                           | <1%                          | <1% | <1% | leaching is negligible        |
| 1 M (CTF)                             | ~ 6.5%                       | >1% | >1% | Fe, Ti leaching is negligible |
| 0.1 M (TF)                            | -                            | 5%  | ~2% | Leaching is significant       |
| 1 M (TF)                              | -                            | 6%  | ~2% | Leaching is significant       |
